# Supplementary material
Source: ML conference proceedings conference paper supplement (https://proceedings.mlr.press/v119/lee20h.html)
Supplement: Supplementary file [file lee20h-supp.pdf]

---

# Supplementary Material

## Temporal Phenotyping using Deep Predictive Clustering of Disease Progression

---

Changhee Lee<sup>1</sup> Mihaela van der Schaar<sup>2,3,1</sup>

### A. AC-TPC for Regression and Binary Classification Tasks

As the task changes, estimating the label distribution and calculating the KL divergence in (1) of the manuscript must be redefined accordingly: For regression task, i.e.,  $\mathcal{Y} = \mathbb{R}$ , we modify the predictor as  $g_\phi : \mathcal{Z} \rightarrow \mathbb{R}$  and replace  $\ell_1$  by  $\ell_1(y_t, \bar{y}_t) = \|y_t - \bar{y}_t\|_2^2$ . Minimizing  $\ell_1(y_t, \bar{y}_t)$  is equivalent to minimizing the KL divergence between  $p(y_t|\mathbf{x}_{1:t})$  and  $p(y_t|s_t)$  when we assume these probability densities follow Gaussian distribution with the same variance. For the  $M$ -dimensional binary classification task, i.e.,  $\mathcal{Y} = \{0, 1\}^M$ , we modify the predictor as  $g_\phi : \mathcal{Z} \rightarrow [0, 1]^M$  and replace  $\ell_1$  by  $\ell_1(y_t, \bar{y}_t) = -\sum_{m=1}^M y_t^m \log \bar{y}_t^m + (1 - y_t^m) \log(1 - \bar{y}_t^m)$  which is required to minimize the KL divergence. Here,  $y_t^m$  and  $\bar{y}_t^m$  indicate the  $m$ -th element of  $y_t$  and  $\bar{y}_t$ , respectively. The basic assumption here is that the distribution of each binary label is independent given the input sequence.

### B. Detailed Derivation of (5)

To derive the gradient of the predictive clustering loss in (5) of the manuscript with respect  $\omega_A = [\theta, \psi]$ , we utilized the ideas from actor-critic models (Konda & Tsitsiklis, 2000) on  $\mathcal{L}_A(\theta, \psi, \phi) = \mathcal{L}_1(\theta, \psi, \phi)$ :

$$\begin{aligned} \nabla_{\omega_A} \mathcal{L}_A(\theta, \psi, \phi) &= \mathbb{E}_{\mathbf{x}, y \sim p_{XY}} \left[ \nabla_{\omega_A} \left( \sum_{t=1}^T \mathbb{E}_{s_t \sim \text{Cat}(\pi_t)} [\ell_1(y_t, \bar{y}_t)] \right) \right] + \alpha \nabla_{\omega_A} \mathcal{L}_2(\theta, \psi) \\ &= \mathbb{E}_{\mathbf{x}, y \sim p_{XY}} \left[ \sum_{t=1}^T \mathbb{E}_{s_t \sim \text{Cat}(\pi_t)} [\ell_1(y_t, \bar{y}_t) \nabla_{\omega_A} \log \pi_t(s_t)] \right] + \alpha \nabla_{\omega_A} \mathcal{L}_2(\theta, \psi), \end{aligned} \quad (\text{S.1})$$

where the second equality comes from the following derivation of the former term:

$$\begin{aligned} \mathbb{E}_{\mathbf{x}, y \sim p_{XY}} \left[ \nabla_{\omega_A} \left( \sum_{t=1}^T \mathbb{E}_{s_t \sim \text{Cat}(\pi_t)} [\ell_1(y_t, \bar{y}_t)] \right) \right] &= \mathbb{E}_{\mathbf{x}, y \sim p_{XY}} \left[ \nabla_{\omega_A} \left( \sum_{t=1}^T \sum_{s_t \in \mathcal{K}} \pi_t(s_t) \ell_1(y_t, \bar{y}_t) \right) \right] \\ &= \mathbb{E}_{\mathbf{x}, y \sim p_{XY}} \left[ \sum_{t=1}^T \sum_{s_t \in \mathcal{K}} \nabla_{\omega_A} \pi_t(s_t) \ell_1(y_t, \bar{y}_t) \right] \\ &= \mathbb{E}_{\mathbf{x}, y \sim p_{XY}} \left[ \sum_{t=1}^T \sum_{s_t \in \mathcal{K}} \frac{\nabla_{\omega_A} \pi_t(s_t)}{\pi_t(s_t)} \pi_t(s_t) \ell_1(y_t, \bar{y}_t) \right] \\ &= \mathbb{E}_{\mathbf{x}, y \sim p_{XY}} \left[ \sum_{t=1}^T \sum_{s_t \in \mathcal{K}} \pi_t(s_t) \ell_1(y_t, \bar{y}_t) \nabla_{\omega_A} \log \pi_t(s_t) \right] \\ &= \mathbb{E}_{\mathbf{x}, y \sim p_{XY}} \left[ \sum_{t=1}^T \mathbb{E}_{s_t \sim \text{Cat}(\pi_t)} [\ell_1(y_t, \bar{y}_t) \nabla_{\omega_A} \log \pi_t(s_t)] \right]. \end{aligned}$$

### C. Pseudo-Code of AC-TPC

As illustrated in Section 3.2, AC-TPC is trained in an iterative fashion. We provide the pseudo-code for optimizing our model in Algorithm 1 and that for initializing the parameters in Algorithm 2.

**Algorithm 1** Pseudo-code for Optimizing AC-TPC

**Input:** Dataset  $\mathcal{D} = \{(\mathbf{x}_t^n, y_t^n)_{t=1}^{T^n}\}_{n=1}^N$ , number of clusters  $K$ , coefficients  $(\alpha, \beta)$ , learning rate  $(\eta_A, \eta_C, \eta_E)$ , mini-batch size  $n_{mb}$ , and update step  $M$   
**Output:** AC-TPC parameters  $(\theta, \psi, \phi)$  and the embedding dictionary  $\mathcal{E}$   
 Initialize parameters  $(\theta, \psi, \phi)$  and the embedding dictionary  $\mathcal{E}$  via `Algorithm 2`

**repeat**

**Optimize the Encoder, Selector, and Predictor**

**for**  $m = 1, \dots, M$  **do**

Sample a mini-batch of  $n_{mb}$  data samples:  $\{(\mathbf{x}_t^n, y_t^n)_{t=1}^{T^n}\}_{n=1}^{n_{mb}} \sim \mathcal{D}$

**for**  $n = 1, \dots, n_{mb}$  **do**

Calculate the assignment probability:  $\pi_t^n = [\pi_t^n(1) \dots \pi_t^n(K)] \leftarrow h_\psi(f_\theta(\mathbf{x}_{1:t}^n))$

Draw the cluster assignment:  $s_t^n \sim \text{Cat}(\pi_t^n)$

Calculate the label distributions:  $\bar{y}_t^n \leftarrow g_\phi(\mathbf{e}(s_t^n))$  and  $\hat{y}_t^n \leftarrow g_\phi(f_\theta(\mathbf{x}_{1:t}^n))$

**end for**

Update the encoder  $f_\theta$  and selector  $h_\psi$ :

$$\theta \leftarrow \theta - \eta_A \left( \frac{1}{n_{mb}} \sum_{n=1}^{n_{mb}} \sum_{t=1}^{T^n} \ell_1(y_t^n, \bar{y}_t^n) \nabla_\theta \log \pi_t^n(s_t^n) - \alpha \nabla_\theta \sum_{k=1}^K \pi_t^n(k) \log \pi_t^n(k) \right)$$

$$\psi \leftarrow \psi - \eta_A \left( \frac{1}{n_{mb}} \sum_{n=1}^{n_{mb}} \sum_{t=1}^{T^n} \ell_1(y_t^n, \bar{y}_t^n) \nabla_\psi \log \pi_t^n(s_t^n) - \alpha \nabla_\psi \sum_{k=1}^K \pi_t^n(k) \log \pi_t^n(k) \right)$$

Update the predictor  $g_\phi$ :

$$\phi \leftarrow \phi - \eta_C \frac{1}{n_{mb}} \sum_{n=1}^{n_{mb}} \sum_{t=1}^{T^n} \nabla_\phi \ell_1(y_t^n, \bar{y}_t^n)$$

**end for**

**Optimize the Cluster Centroids**

**for**  $m = 1, \dots, M$  **do**

Sample a mini-batch of  $n_{mb}$  data samples:  $\{(\mathbf{x}_t^n, y_t^n)_{t=1}^{T^n}\}_{n=1}^{n_{mb}} \sim \mathcal{D}$

**for**  $n = 1, \dots, n_{mb}$  **do**

Calculate the assignment probability:  $\pi_t^n = [\pi_t^n(1) \dots \pi_t^n(K)] \leftarrow h_\psi(f_\theta(\mathbf{x}_{1:t}^n))$

Draw the cluster assignment:  $s_t^n \sim \text{Cat}(\pi_t^n)$

Calculate the label distributions:  $\bar{y}_t^n \leftarrow g_\phi(\mathbf{e}(s_t^n))$

**end for**

**for**  $k = 1, \dots, K$  **do**

Update the embeddings  $\mathbf{e}(k)$ :

$$\mathbf{e}(k) \leftarrow \mathbf{e}(k) - \eta_E \left( \frac{1}{n_{mb}} \sum_{n=1}^{n_{mb}} \sum_{t=1}^{T^n} \nabla_{\mathbf{e}(k)} \ell_1(y_t^n, \bar{y}_t^n) - \gamma \sum_{\substack{k'=1 \\ k' \neq k}}^K \nabla_{\mathbf{e}(k)} \ell_1(g_\phi(\mathbf{e}(k)), g_\phi(\mathbf{e}(k'))) \right)$$

**end for**

Update the embedding dictionary:  $\mathcal{E} \leftarrow \{\mathbf{e}(1), \dots, \mathbf{e}(K)\}$

**end for**

**until** convergence

**Algorithm 2** Pseudo-code for pre-training AC-TPC

**Input:** Dataset  $\mathcal{D} = \{(\mathbf{x}_t^n, y_t^n)_{t=1}^{T^n}\}_{n=1}^N$ , number of clusters  $K$ , learning rate  $\eta$ , mini-batch size  $n_{mb}$   
**Output:** AC-TPC parameters  $(\theta, \psi, \phi)$  and the embedding dictionary  $\mathcal{E}$   
 Initialize parameters  $(\theta, \psi, \phi)$  via Xavier Initializer

**Pre-train the Encoder and Predictor**

**repeat**

Sample a mini-batch of  $n_{mb}$  data samples:  $\{(\mathbf{x}_t^n, y_t^n)_{t=1}^{T^n}\}_{n=1}^{n_{mb}} \sim \mathcal{D}$

**for**  $n = 1, \dots, n_{mb}$  **do**

Calculate the label distributions:  $\hat{y}_t^n \leftarrow g_\phi(f_\theta(\mathbf{x}_{1:t}^n))$

**end for**

$$\theta \leftarrow \theta - \eta \frac{1}{n_{mb}} \sum_{n=1}^{n_{mb}} \sum_{t=1}^{T^n} \nabla_{\theta} \ell_1(y_t^n, \hat{y}_t^n) \quad \phi \leftarrow \phi - \eta \frac{1}{n_{mb}} \sum_{n=1}^{n_{mb}} \sum_{t=1}^{T^n} \nabla_{\phi} \ell_1(y_t^n, \hat{y}_t^n)$$

**until** convergence

**Initialize the Cluster Centroids**

Calculate the embedding dictionary  $\mathcal{E}$  and initial cluster assignments  $c_t^n$

$$\mathcal{E}, \{c_t^n\}_{t=1}^{T^n} \leftarrow \text{K-means}(\{\{\mathbf{z}_t^n\}_{t=1}^{T^n}\}_{n=1}^N, K)$$

**Pre-train the Selector**

**repeat**

Sample a mini-batch of  $n_{mb}$  data samples:  $\{(\mathbf{x}_t^n, y_t^n)_{t=1}^{T^n}\}_{n=1}^{n_{mb}} \sim \mathcal{D}$

**for**  $n = 1, \dots, n_{mb}$  **do**

Calculate the assignment probability:  $\pi_t^n = [\pi_t^n(1) \dots \pi_t^n(K)] \leftarrow h_\psi(f_\theta(\mathbf{x}_{1:t}^n))$

**end for**

Update the selector  $h_\psi$ :

$$\psi \leftarrow \psi + \eta \frac{1}{n_{mb}} \sum_{n=1}^{n_{mb}} \sum_{t=1}^{T^n} \sum_{k=1}^K c_t^n(k) \log \pi_t^n(k)$$

**until** convergence

## D. Details of the Datasets

### D.1. UKCF Dataset

UK Cystic Fibrosis registry (UKCF)<sup>1</sup> records annual follow-ups for 5,171 adult patients (aged 18 years or older) over the period from 2008 and 2015, with a total of 25,012 hospital visits. Each patient is associated with 89 variables (i.e., 11 static and 78 time-varying features), including information on demographics and genetic mutations, bacterial infections, lung function scores, therapeutic managements, and diagnosis on comorbidities. The detailed statistics are given in Table S.1.

### D.2. ADNI Dataset

Alzheimer’s Disease Neuroimaging Initiative (ADNI)<sup>2</sup> study consists of 1,346 patients with a total of 11,651 hospital visits, which tracks the disease progression via follow-up observations at 6 months interval. Each patient is associated with 21 variables (i.e., 5 static and 16 time-varying features), including information on demographics, biomarkers on brain functions, and cognitive test results. The three diagnostic groups were normal brain functioning (0.55), mild cognitive impairment (0.43), and Alzheimer’s disease (0.02). The detailed statistics are given in Table S.2.

## E. Details of the Benchmarks

We compared AC-TPC in the experiments with clustering methods ranging from conventional approaches based on  $K$ -means to the state-of-the-art approaches based on deep neural networks. The details of how we implemented the benchmarks are described as the following:

<sup>1</sup><https://www.cysticfibrosis.org.uk/the-work-we-do/uk-cf-registry>

<sup>2</sup><https://adni.loni.usc.edu>

Temporal Phenotyping using Deep Predictive Clustering of Disease Progression

Table S.1. Summary and description of the UKCF dataset.

| STATIC COVARIATES  |                    | Type | Mean |                   | Type | Mean |
|--------------------|--------------------|------|------|-------------------|------|------|
| <b>Demographic</b> | Gender             | Bin. | 0.55 |                   |      |      |
| <b>Genetic</b>     | Class I Mutation   | Bin. | 0.05 | Class VI Mutation | Bin. | 0.86 |
|                    | Class II Mutation  | Bin. | 0.87 | DF508 Mutation    | Bin. | 0.87 |
|                    | Class III Mutation | Bin. | 0.89 | G551D Mutation    | Bin. | 0.06 |
|                    | Class IV Mutation  | Bin. | 0.05 | Homozygous        | Bin. | 0.58 |
|                    | Class V Mutation   | Bin. | 0.04 | Heterozygous      | Bin. | 0.42 |

  

| TIME-VARYING COVARIATES  |                          | Type          | Mean | Min / Max    | Type                          | Mean            | Min / Max             |      |
|--------------------------|--------------------------|---------------|------|--------------|-------------------------------|-----------------|-----------------------|------|
| <b>Demographic</b>       | Age                      | Cont.         | 30.4 | 18.0 / 86.0  | Height                        | Cont.           | 168.0 / 129.0 / 198.6 |      |
|                          | Weight                   | Cont.         | 64.1 | 24.0 / 173.3 | BMI                           | Cont.           | 22.6 / 10.9 / 30.0    |      |
|                          | Smoking Status           | Bin.          | 0.1  |              |                               |                 |                       |      |
| <b>Lung Func. Scores</b> | FEV <sub>1</sub>         | Cont.         | 2.3  | 0.2 / 6.3    | Best FEV <sub>1</sub>         | Cont.           | 2.5 / 0.3 / 8.0       |      |
|                          | FEV <sub>1</sub> % Pred. | Cont.         | 65.1 | 9.0 / 197.6  | Best FEV <sub>1</sub> % Pred. | Cont.           | 71.2 / 7.5 / 164.3    |      |
| <b>Hospitalization</b>   | IV ABX Days Hosp.        | Cont.         | 12.3 | 0 / 431      | Non-IV Hosp. Adm.             | Cont.           | 1.2 / 0 / 203         |      |
|                          | IV ABX Days Home         | Cont.         | 11.9 | 0 / 441      |                               |                 |                       |      |
| <b>Lung Infections</b>   | B. Cepacia               | Bin.          | 0.05 |              | P. Aeruginosa                 | Bin.            | 0.59                  |      |
|                          | H. Influenza             | Bin.          | 0.05 |              | K. Pneumoniae                 | Bin.            | 0.00                  |      |
|                          | E. Coli                  | Bin.          | 0.01 |              | ALCA                          | Bin.            | 0.03                  |      |
|                          | Aspergillus              | Bin.          | 0.14 |              | NTM                           | Bin.            | 0.03                  |      |
|                          | Gram-Negative            | Bin.          | 0.01 |              | Xanthomonas                   | Bin.            | 0.05                  |      |
|                          | S. Aureus                | Bin.          | 0.30 |              |                               |                 |                       |      |
| <b>Comorbidities</b>     | Liver Disease            | Bin.          | 0.16 |              | Depression                    | Bin.            | 0.07                  |      |
|                          | Asthma                   | Bin.          | 0.15 |              | Hemoptysis                    | Bin.            | 0.01                  |      |
|                          | ABPA                     | Bin.          | 0.12 |              | Pancreatitis                  | Bin.            | 0.01                  |      |
|                          | Hypertension             | Bin.          | 0.04 |              | Hearing Loss                  | Bin.            | 0.03                  |      |
|                          | Diabetes                 | Bin.          | 0.28 |              | Gall bladder                  | Bin.            | 0.01                  |      |
|                          | Arthropathy              | Bin.          | 0.09 |              | Colonic structure             | Bin.            | 0.00                  |      |
|                          | Bone fracture            | Bin.          | 0.01 |              | Intest. Obstruction           | Bin.            | 0.08                  |      |
|                          | Osteoporosis             | Bin.          | 0.09 |              | GI bleed – no var.            | Bin.            | 0.00                  |      |
|                          | Osteopenia               | Bin.          | 0.21 |              | GI bleed – var.               | Bin.            | 0.00                  |      |
|                          | Cancer                   | Bin.          | 0.00 |              | Liver Enzymes                 | Bin.            | 0.16                  |      |
|                          | Cirrhosis                | Bin.          | 0.03 |              | Kidney Stones                 | Bin.            | 0.02                  |      |
|                          | <b>Treatments</b>        | Dornase Alpha | Bin. | 0.56         |                               | Inhaled B. BAAC | Bin.                  | 0.03 |
|                          |                          | Anti-fungals  | Bin. | 0.07         |                               | Inhaled B. LAAC | Bin.                  | 0.08 |
|                          |                          | HyperSaline   | Bin. | 0.23         |                               | Inhaled B. SAAC | Bin.                  | 0.05 |
| HypertonicSaline         |                          | Bin.          | 0.01 |              | Inhaled B. LABA               | Bin.            | 0.11                  |      |
| Tobi Solution            |                          | Bin.          | 0.20 |              | Inhaled B. Dilators           | Bin.            | 0.57                  |      |
| Cortico Combo            |                          | Bin.          | 0.41 |              | Cortico Inhaled               | Bin.            | 0.15                  |      |
| Non-IV Ventilation       |                          | Bin.          | 0.05 |              | Oral B. Theoph.               | Bin.            | 0.04                  |      |
| Acetylcysteine           |                          | Bin.          | 0.02 |              | Oral B. BA                    | Bin.            | 0.03                  |      |
| Aminoglycoside           |                          | Bin.          | 0.03 |              | Oral Hypo. Agents             | Bin.            | 0.01                  |      |
| iBuprofen                |                          | Bin.          | 0.00 |              | Chronic Oral ABX              | Bin.            | 0.53                  |      |
| Drug Dornase             |                          | Bin.          | 0.02 |              | Cortico Oral                  | Bin.            | 0.14                  |      |
| HDI Buprofen             |                          | Bin.          | 0.00 |              | Oxygen Therapy                | Bin.            | 0.11                  |      |
| Tobramycin               |                          | Bin.          | 0.03 |              | O <sub>2</sub> Exacerbation   | Bin.            | 0.03                  |      |
| Leukotriene              |                          | Bin.          | 0.07 |              | O <sub>2</sub> Nocturnal      | Bin.            | 0.03                  |      |
| Colistin                 |                          | Bin.          | 0.03 |              | O <sub>2</sub> Continuous     | Bin.            | 0.03                  |      |
| Diabetes Insulin         |                          | Bin.          | 0.01 |              | O <sub>2</sub> Pro re nata    | Bin.            | 0.01                  |      |
| Macrolida ABX            |                          | Bin.          | 0.02 |              |                               |                 |                       |      |

ABX: antibiotics

Table S.2. Summary and description of the ADNI dataset.

| STATIC COVARIATES  |                   | Type  | Mean | Min/Max (Mode) | Type           | Mean | Min/Max (Mode)        |
|--------------------|-------------------|-------|------|----------------|----------------|------|-----------------------|
| <b>Demographic</b> | Race              | Cat.  | 0.93 | White          | Ethnicity      | Cat. | 0.97 / No Hisp/Latino |
|                    | Education         | Cat.  | 0.23 | C16            | Marital Status | Cat. | 0.75 / Married        |
| <b>Genetic</b>     | APOE <sub>4</sub> | Cont. | 0.44 | 0/2            |                |      |                       |

  

| TIME-VARYING COVARIATES |                  | Type  | Mean   | Min / Max       | Type              | Mean  | Min / Max                |
|-------------------------|------------------|-------|--------|-----------------|-------------------|-------|--------------------------|
| <b>Demographic</b>      | Age              | Cont. | 73.6   | 55/92           |                   |       |                          |
| <b>Biomarker</b>        | Entorhinal       | Cont. | 3.6E+3 | 1.0E+3 / 6.7E+3 | Mid Temp          | Cont. | 2.0E+4 / 8.9E+3 / 3.2E+4 |
|                         | Fusiform         | Cont. | 1.8E+5 | 9.0E+4 / 2.9E+5 | Ventricles        | Cont. | 4.1E+4 / 5.7E+3 / 1.6E+5 |
|                         | Hippocampus      | Cont. | 6.9E+3 | 2.8E+3 / 1.1E+4 | Whole Brain       | Cont. | 1.0E+6 / 6.5E+5 / 1.5E+6 |
|                         | Intracranial     | Cont. | 1.5E+6 | 2.9E+2 / 2.1E+6 |                   |       |                          |
| <b>Cognitive</b>        | ADAS-11          | Cont. | 8.58   | 0/70            | ADAS-13           | Cont. | 13.61 / 0/85             |
|                         | CRD Sum of Boxes | Cont. | 1.21   | 0/17            | Mini Mental State | Cont. | 27.84 / 2/30             |
|                         | RAVLT Forgetting | Cont. | 4.19   | -12/15          | RAVLT Immediate   | Cont. | 38.25 / 0/75             |
|                         | RAVLT Learning   | Cont. | 4.65   | -5/14           | RAVLT Percent     | Cont. | 51.70 / -500/100         |

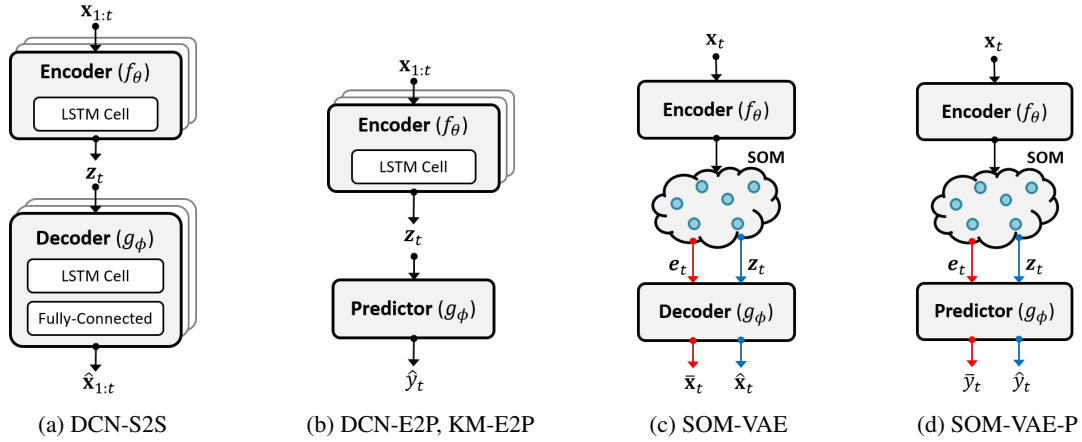

Figure S.1. The block diagrams of the tested benchmarks.

Table S.3. Comparison table of benchmarks.

| Methods                  | Handling Time-Series | Clustering Method | Similarity Measure         | Label Provided | Label Associated |
|--------------------------|----------------------|-------------------|----------------------------|----------------|------------------|
| KM-DTW                   | DTW                  | $K$ -means        | DTW                        | N              | N                |
| KM-E2P ( $\mathcal{Z}$ ) | RNN                  | $K$ -means        | Euclidean in $\mathcal{Z}$ | Y              | Y (indirect)     |
| KM-E2P ( $\mathcal{Y}$ ) | RNN                  | $K$ -means        | Euclidean in $\mathcal{Y}$ | Y              | Y (direct)       |
| DCN-S2S                  | RNN                  | $K$ -means        | Euclidean in $\mathcal{Z}$ | N              | N                |
| DCN-E2P                  | RNN                  | $K$ -means        | Euclidean in $\mathcal{Z}$ | Y              | Y (indirect)     |
| SOM-VAE                  | Markov model         | embedding mapping | reconstruction loss        | N              | N                |
| SOM-VAE-P                | Markov model         | embedding mapping | prediction loss            | Y              | Y (direct)       |
| Proposed                 | RNN                  | embedding mapping | KL divergence              | Y              | Y (direct)       |

- **Dynamic time warping followed by  $K$ -means<sup>3</sup>:** Dynamic time warping (DTW) is utilized to quantify pairwise distance between two variable-length sequences and, then,  $K$ -means is applied (denoted as **KM-DTW**).
- **$K$ -means with deep neural networks:** To handle variable-length time-series data, we utilized an encoder-predictor network as depicted in Figure S.1b and trained the network based on (6) for dimensionality reduction; this is to provide fixed-length and low-dimensional representations for time-series. Then, we applied  $K$ -means on the latent encodings  $z$  (denoted as **KM-E2P** ( $\mathcal{Z}$ )) and on the predicted label distributions  $\hat{y}$  (denoted as **KM-E2P** ( $\mathcal{Y}$ )), respectively. We implemented the encoder and predictor of KM-E2P with the same network architectures with those of our model: the encoder is a single-layer LSTM with 50 nodes and the decoder is a two-layered fully-connected network with 50 nodes in each layer.
- **Extensions of DCN<sup>4</sup>** (Yang et al., 2017): Since the DCN is designed for static data, we utilized a sequence-to-sequence model in Figure S.1a for the encoder-decoder network as an extension to incorporate time-series data (denoted as **DCN-S2S**) and trained the network based on the reconstruction loss (using the reconstructed input sequence  $\hat{x}_{1:t}$ ). For implementing DCN-S2S, we used a single-layer LSTM with 50 nodes for both the encoder and the decoder. And, we augmented a fully-connected layer with 50 nodes is used to reconstruct the original input sequence from the latent representation of the decoder.

In addition, since predictive clustering is associated with the label distribution, we compared a DCN whose encoder-decoder structure is replaced with our encoder-predictor network in Figure S.1b (denoted as **DCN-E2P**) to focus the dimensionality reduction – and, thus, finding latent encodings where clustering is performed – on the information for predicting the label distribution. We implemented the encoder and predictor of DCN-E2P with the same network architectures with those of our model as described in Section 5.

<sup>3</sup><https://github.com/rtavenar/tslearn>

<sup>4</sup><https://github.com/boyangumn/DCN>

- **SOM-VAE<sup>5</sup>** (Fortuin et al., 2019): We compare with SOM-VAE – though, this method is oriented towards visualization of input data via SOM – since it naturally clusters time-series data assuming Markov property (denoted as **SOM-VAE**). We replace the original CNN architecture of the encoder and the decoder with three-layered fully-connected network with 50 nodes in each layer, respectively. The network architecture is depicted in Figure S.1c where  $\hat{x}_t$  and  $\bar{x}_t$  indicate the reconstructed inputs based on the encoding  $z_t$  and the embedding  $e_t$  at time  $t$ , respectively.

In addition, we compare with a variation of SOM-VAE by replacing the decoder with the predictor to encourage the latent encoding to capture information for predicting the label distribution (denoted as **SOM-VAE-P**). For the implementation, we replaced the decoder of SOM-VAE with our predictor which is a two-layered fully-connected layer with 50 nodes in each layer to predict the label distribution as illustrated in Figure S.1d. Here,  $\hat{y}_t$  and  $\bar{y}_t$  indicate the predicted labels based on the encoding  $z_t$  and the embedding  $e_t$  at time  $t$ , respectively.

For both cases, we used the default values for balancing coefficients of SOM-VAE and the dimension of SOM to be equal to  $K$ .

We compared and summarized major components of the benchmarks in Table S.3.

## F. Additional Experiments

### F.1. Contributions of the Auxiliary Loss Functions

As described in Section 3.1, we introduced two auxiliary loss functions – the sample-wise entropy of cluster assignment (3) and the embedding separation loss (4) – to avoid trivial solution that may arise in identifying the predictive clusters. To analyze the contribution of each auxiliary loss function, we report the average number of activated clusters, clustering performance, and prediction performance on the UKCF dataset with 3 comorbidities as described in Section 5.4. Throughout the experiment, we set  $K = 16$  – which is larger than  $C$  – to find the contribution of these loss functions to the number of activated clusters.

Table S.4. Performance comparison with varying the balancing coefficients  $\alpha, \beta$  for the UKCF dataset.

| Coefficients |         | Clustering Performance |                   |                   |                   | Prognostic Value  |                   |
|--------------|---------|------------------------|-------------------|-------------------|-------------------|-------------------|-------------------|
| $\alpha$     | $\beta$ | Activated No.          | Purity            | NMI               | ARI               | AUROC             | AUPRC             |
| 0.0          | 0.0     | 16                     | 0.573±0.01        | 0.006±0.00        | 0.000±0.00        | 0.500±0.00        | 0.169±0.00        |
| 0.0          | 1.0     | 16                     | 0.573±0.01        | 0.006±0.00        | 0.000±0.00        | 0.500±0.00        | 0.169±0.00        |
| 3.0          | 0.0     | 8.4                    | 0.795±0.01        | 0.431±0.01        | 0.569±0.01        | 0.840±0.01        | 0.583±0.02        |
| 3.0          | 1.0     | 8                      | <b>0.808±0.01</b> | <b>0.468±0.01</b> | <b>0.606±0.01</b> | <b>0.852±0.00</b> | <b>0.608±0.01</b> |

As we can see in Table S.4, both auxiliary loss functions make important contributions in improving the quality of predictive clustering. More specifically, the sample-wise entropy encourages the selector to choose one dominant cluster. Thus, as we can see results with  $\alpha = 0$ , without the sample-wise entropy, our selector assigns an equal probability to all 16 clusters which results in a trivial solution. We observed that, by augmenting the embedding separation loss (4), AC-TPC identifies a smaller number of clusters owing to the well-separated embeddings.

### F.2. Additional Results on Targeting Multiple Future Outcomes

Throughout the experiment in Section 5.5, we identified 12 subgroups of patients that are associated with the next-year development of 22 different comorbidities in the UKCF dataset. In Table S.5, we reported 12 identified clusters and the full list of comorbidities developed in the next year since the latest observation and the corresponding frequency which is calculated in a cluster-specific fashion based on the true label.

As we can see in the table, the identified clusters displayed very different label distributions; that is, the combination of comorbidities as well as their frequency were very different across the clusters. For example, patients in Cluster 1 experienced low-risk of developing any comorbidities in the next year while 85% of patients in Cluster 0 experienced diabetes in the next year.

<sup>5</sup><https://github.com/ratschlab/SOM-VAE>

**Temporal Phenotyping using Deep Predictive Clustering of Disease Progression**

Table S.5. The comorbidities developed in the next year for the 12 identified clusters. The values in parentheses indicate the corresponding frequency.

| Clusters   | Comorbidities and Frequencies |                            |                            |                            |
|------------|-------------------------------|----------------------------|----------------------------|----------------------------|
| Cluster 0  | Diabetes (0.85)               | Liver Enzymes (0.21)       | Arthropathy (0.14)         | Depression (0.10)          |
|            | Hypertens (0.08)              | Osteopenia (0.07)          | Intest. Obstruction (0.07) | Cirrhosis (0.04)           |
|            | ABPA (0.04)                   | Liver Disease (0.04)       | Osteoporosis (0.03)        | Hearing Loss (0.03)        |
|            | Asthma (0.02)                 | Kidney Stones (0.01)       | Bone fracture (0.01)       | Hemoptysis (0.01)          |
|            | Pancreatitis (0.01)           | Cancer (0.00)              | Gall bladder (0.00)        | Colonic stricture (0.00)   |
|            | GI bleed – no var. (0.00)     | GI bleed – var. (0.00)     |                            |                            |
| Cluster 1  | Liver Enzymes (0.09)          | Arthropathy (0.08)         | Depression (0.07)          | Intest. Obstruction (0.06) |
|            | Diabetes (0.06)               | Osteopenia (0.05)          | ABPA (0.04)                | Asthma (0.03)              |
|            | Liver Disease (0.03)          | Hearing Loss (0.03)        | Osteoporosis (0.02)        | Pancreatitis (0.02)        |
|            | Kidney Stones (0.02)          | Hypertension (0.01)        | Cirrhosis (0.01)           | Gall bladder (0.01)        |
|            | Cancer (0.01)                 | Hemoptysis (0.00)          | Bone fracture (0.00)       | Colonic stricture (0.00)   |
|            | GI bleed – no var. (0.00)     | GI bleed – var. (0.00)     |                            |                            |
| Cluster 2  | ABPA (0.77)                   | Osteopenia (0.21)          | Intest. Obstruction (0.11) | Hearing Loss (0.10)        |
|            | Liver Enzymes (0.07)          | Diabetes (0.06)            | Depression (0.05)          | Pancreatitis (0.05)        |
|            | Liver Disease (0.04)          | Arthropathy (0.04)         | Asthma (0.03)              | Bone fracture (0.02)       |
|            | Osteoporosis (0.02)           | Hypertension (0.01)        | Cancer (0.01)              | Cirrhosis (0.01)           |
|            | Kidney Stones (0.01)          | Gall bladder (0.01)        | Hemoptysis (0.00)          | Colonic stricture (0.00)   |
|            | GI bleed – no var. (0.00)     | GI bleed – var. (0.00)     |                            |                            |
| Cluster 3  | Asthma (0.89)                 | Liver Disease (0.87)       | Diabetes (0.29)            | Osteopenia (0.28)          |
|            | Liver Enzymes (0.24)          | ABPA (0.15)                | Osteoporosis (0.11)        | Hearing Loss (0.06)        |
|            | Arthropathy (0.05)            | Intest. Obstruction (0.05) | Depression (0.04)          | Hypertension (0.03)        |
|            | Cirrhosis (0.02)              | Kidney Stones (0.02)       | Pancreatitis (0.02)        | Gall bladder (0.02)        |
|            | Cancer (0.01)                 | Bone fracture (0.00)       | Hemoptysis (0.00)          | Colonic stricture (0.00)   |
|            | GI bleed – no var. (0.00)     | GI bleed – var. (0.00)     |                            |                            |
| Cluster 4  | Osteoporosis (0.76)           | Diabetes (0.43)            | Arthropathy (0.20)         | Liver Enzymes (0.18)       |
|            | Osteopenia (0.15)             | Depression (0.13)          | Intest. Obstruction (0.11) | ABPA (0.11)                |
|            | Hearing Loss (0.09)           | Liver Disease (0.08)       | Hypertension (0.07)        | Cirrhosis (0.07)           |
|            | Kidney Stones (0.03)          | Asthma (0.02)              | Hemoptysis (0.02)          | Bone fracture (0.02)       |
|            | Gall bladder (0.01)           | Pancreatitis (0.01)        | Cancer (0.00)              | Colonic stricture (0.00)   |
|            | GI bleed – no var. (0.00)     | GI bleed – var. (0.00)     |                            |                            |
| Cluster 5  | Asthma (0.88)                 | Diabetes (0.81)            | Osteopenia (0.28)          | ABPA (0.24)                |
|            | Liver Enzymes (0.22)          | Depression (0.15)          | Osteoporosis (0.14)        | Intest. Obstruction (0.12) |
|            | Hypertension (0.10)           | Cirrhosis (0.10)           | Liver Disease (0.09)       | Arthropathy (0.08)         |
|            | Bone fracture (0.01)          | Hemoptysis (0.01)          | Pancreatitis (0.01)        | Hearing Loss (0.01)        |
|            | Cancer (0.01)                 | Kidney Stones (0.01)       | GI bleed – var. (0.01)     | Gall bladder (0.00)        |
|            | Colonic stricture (0.00)      | GI bleed – no var. (0.00)  |                            |                            |
| Cluster 6  | Liver Disease (0.85)          | Liver Enzymes (0.37)       | Osteopenia (0.27)          | ABPA (0.09)                |
|            | Arthropathy (0.07)            | Diabetes (0.06)            | Intest. Obstruction (0.06) | Osteoporosis (0.05)        |
|            | Depression (0.03)             | Asthma (0.03)              | Hearing Loss (0.03)        | Cirrhosis (0.02)           |
|            | Hemoptysis (0.02)             | Hypertension (0.01)        | Kidney Stones (0.01)       | Pancreatitis (0.00)        |
|            | Gall bladder (0.00)           | Bone fracture (0.00)       | Cancer (0.00)              | Colonic stricture (0.00)   |
|            | GI bleed – no var. (0.00)     | GI bleed – var. (0.00)     |                            |                            |
| Cluster 7  | ABPA (0.83)                   | Diabetes (0.78)            | Osteopenia (0.25)          | Osteoporosis (0.24)        |
|            | Liver Enzymes (0.15)          | Intest. Obstruction (0.12) | Liver Disease (0.09)       | Hypertension (0.07)        |
|            | Hearing Loss (0.07)           | Arthropathy (0.06)         | Depression (0.04)          | Cirrhosis (0.02)           |
|            | Asthma (0.01)                 | Bone fracture (0.01)       | Kidney Stones (0.01)       | Hemoptysis (0.01)          |
|            | Cancer (0.00)                 | Pancreatitis (0.00)        | Gall bladder (0.00)        | Colonic stricture (0.00)   |
|            | GI bleed – no var. (0.00)     | GI bleed – var. (0.00)     |                            |                            |
| Cluster 8  | Diabetes (0.94)               | Liver Disease (0.83)       | Liver Enzymes (0.43)       | Osteopenia (0.30)          |
|            | Hearing Loss (0.11)           | Osteoporosis (0.10)        | Intest. Obstruction (0.09) | Cirrhosis (0.08)           |
|            | Depression (0.08)             | ABPA (0.07)                | Arthropathy (0.06)         | Hypertension (0.05)        |
|            | Kidney Stones (0.05)          | Asthma (0.02)              | Hemoptysis (0.01)          | Bone fracture (0.01)       |
|            | Cancer (0.00)                 | Pancreatitis (0.00)        | Gall bladder (0.00)        | Colonic stricture (0.00)   |
|            | GI bleed – no var. (0.00)     | GI bleed – var. (0.00)     |                            |                            |
| Cluster 9  | Asthma (0.89)                 | Osteopenia (0.26)          | ABPA (0.19)                | Arthropathy (0.14)         |
|            | Intest. Obstruction (0.11)    | Depression (0.08)          | Osteoporosis (0.08)        | Diabetes (0.06)            |
|            | Liver Enzymes (0.06)          | Hemoptysis (0.03)          | Hypertension (0.02)        | Liver Disease (0.02)       |
|            | Pancreatitis (0.02)           | Bone fracture (0.01)       | Cancer (0.01)              | Cirrhosis (0.01)           |
|            | Gall bladder (0.01)           | Hearing Loss (0.01)        | Kidney Stones (0.00)       | Colonic stricture (0.00)   |
|            | GI bleed – no var. (0.00)     | GI bleed – var. (0.00)     |                            |                            |
| Cluster 10 | Osteopenia (0.82)             | Diabetes (0.81)            | Arthropathy (0.23)         | Depression (0.19)          |
|            | Liver Enzymes (0.18)          | Hypertension (0.16)        | Hearing Loss (0.10)        | Liver Disease (0.10)       |
|            | Osteoporosis (0.10)           | Intest. Obstruction (0.09) | ABPA (0.09)                | Kidney Stones (0.07)       |
|            | Cirrhosis (0.05)              | Asthma (0.01)              | Cancer (0.00)              | GI bleed – var. (0.00)     |
|            | Bone fracture (0.00)          | Hemoptysis (0.00)          | Pancreatitis (0.00)        | Gall bladder (0.00)        |
|            | Colonic stricture (0.00)      | GI bleed – no var. (0.00)  |                            |                            |
| Cluster 11 | Osteopenia (0.77)             | Liver Enzymes (0.18)       | Arthropathy (0.12)         | Depression (0.09)          |
|            | Hypertension (0.06)           | Diabetes (0.06)            | Hearing Loss (0.06)        | ABPA (0.05)                |
|            | Liver Disease (0.05)          | Osteoporosis (0.04)        | Intest. Obstruction (0.04) | Cirrhosis (0.02)           |
|            | Asthma (0.02)                 | Pancreatitis (0.02)        | Bone fracture (0.01)       | Cancer (0.01)              |
|            | Kidney Stones (0.00)          | Gall bladder (0.00)        | Colonic stricture (0.00)   | Hemoptysis (0.00)          |
|            | GI bleed – no var. (0.00)     | GI bleed – var. (0.00)     |                            |                            |

## References

- Fortuin, V., Hüser, M., Locatello, F., Strathmann, H., and Rätsch, G. SOM-VAE: Interpretable discrete representation learning on time series. *In Proceedings of the 7th International Conference on Learning Representations (ICLR 2019)*, 2019.
- Konda, V. R. and Tsitsiklis, J. N. Actor-critic algorithms. *In Proceedings of the 13th Conference on Neural Information Processing Systems (NIPS 2000)*, 2000.
- Yang, B., Fu, X., Sidiropoulos, N. D., and Hong, M. Towards k-means-friendly spaces: Simultaneous deep learning and clustering. *In Proceedings of the 34th International Conference on Machine Learning (ICML 2017)*, 2017.
